# Supplementary material
Source: Research Square preprint supplement (doi:10.21203/rs.3.rs-10062425/v1)
Supplement: Supplementary file 1 [file c92e9e335949cb2408896d7e.docx]

**Supplementary Table 1.** Overall and Sex‐Stratified Atherosclerotic Heart Disease (ASHD) and Heart Failure (HF)-related Age-Adjusted Mortality Rates (AAMR) per 100,000 in in the United States, (1999–2023)

| **Age-Adjusted Rate (95% CI)** | | | |
| --- | --- | --- | --- |
| **Year** | **Men** | **Women** | **Overall** |
| 1999 | 69.34 (68.68–70.00) | 48.25 (47.84–48.66) | 56.59 (56.24–56.94) |
| 2000 | 67.24 (66.60–67.88) | 46.19 (45.80–46.58) | 54.55 (54.21–54.89) |
| 2001 | 64.25 (63.63–64.87) | 44.57 (44.18–44.95) | 52.42 (52.08–52.75) |
| 2002 | 63.05 (62.45–63.66) | 42.74 (42.37–43.12) | 50.76 (50.44–51.09) |
| 2003 | 61.53 (60.94–62.13) | 41.37 (41.00–41.74) | 49.36 (49.04–49.68) |
| 2004 | 58.69 (58.12–59.27) | 38.30 (37.95–38.66) | 46.35 (46.04–46.66) |
| 2005 | 58.40 (57.84–58.97) | 38.08 (37.73–38.43) | 46.10 (45.79–46.40) |
| 2006 | 55.02 (54.48–55.56) | 35.02 (34.69–35.35) | 42.95 (42.66–43.24) |
| 2007 | 52.04 (51.52–52.56) | 32.65 (32.33–32.97) | 40.36 (40.08–40.64) |
| 2008 | 50.99 (50.49–51.49) | 31.70 (31.39–32.01) | 39.40 (39.12–39.67) |
| 2009 | 48.42 (47.93–48.90) | 28.79 (28.50–29.09) | 36.61 (36.35–36.87) |
| 2010 | 48.16 (47.68–48.63) | 28.05 (27.76–28.34) | 36.07 (35.81–36.32) |
| 2011 | 46.68 (46.22–47.14) | 26.86 (26.59–27.14) | 34.85 (34.60–35.10) |
| 2012 | 45.25 (44.81–45.70) | 25.65 (25.38–25.92) | 33.57 (33.33–33.81) |
| 2013 | 45.19 (44.75–45.63) | 25.11 (24.84–25.37) | 33.25 (33.02–33.49) |
| 2014 | 44.91 (44.48–45.35) | 24.21 (23.95–24.47) | 32.66 (32.43–32.89) |
| 2015 | 45.12 (44.69–45.55) | 24.68 (24.42–24.93) | 33.09 (32.86–33.32) |
| 2016 | 44.94 (44.52–45.36) | 23.44 (23.19–23.69) | 32.30 (32.07–32.52) |
| 2017 | 45.73 (45.31–46.15) | 23.61 (23.36–23.85) | 32.79 (32.57–33.02) |
| 2018 | 46.24 (45.82–46.65) | 23.63 (23.39–23.88) | 33.01 (32.79–33.24) |
| 2019 | 46.81 (46.40–47.22) | 23.48 (23.24–23.72) | 33.23 (33.01–33.45) |
| 2020 | 50.64 (50.22–51.06) | 25.21 (24.96–25.46) | 35.90 (35.67–36.12) |
| 2021 | 53.41 (52.97–53.86) | 26.20 (25.94–26.47) | 37.67 (37.44–37.91) |
| 2022 | 50.82 (50.39–51.24) | 24.34 (24.10–24.58) | 35.32 (35.09–35.54) |
| 2023 | 49.34 (48.93–49.75) | 24.15 (23.90–24.39) | 34.79 (34.57–35.01) |

**Supplementary Table 2** Annual percent change (APC) and Average Annual Percent Change (AAPC) of Atherosclerotic Cardiovascular Disease (ASCVD) and Heart Failure (HF)–related Age-Adjusted Mortality Rates (AAMR) per 100,000 in the United States, 1999 to 2023

| **Variable** | **Years** | **APC (95% CI)** | **AAPC (95% CI)** |
| --- | --- | --- | --- |
| **Overall** | 1999–2012 | −4.1* (−4.3 to −3.9) | −2.1 (−2.7 to −1.4)* |
|  | 2012–2018 | −0.4 (−1.5 to 0.7) |
|  | 2018–2021 | 4.7* (0.0 to 9.6) |
|  | 2021–2023 | −3.8 (−7.8 to 0.4) |
| **Sex** |  |  |  |
| Female | 1999–2003 | −3.9* (−5.3 to −2.4) | −2.9 (−3.7 to −2.0)* |
|  | 2003–2012 | −5.3* (−5.8 to −4.7) |
|  | 2012–2018 | −1.4* (−2.8 to −0.1) |
|  | 2018–2021 | 3.7 (−2.0 to 9.8) |
|  | 2021–2023 | −3.9 (−9.1 to 1.5) |
| Male | 1999–2012 | −3.3* (−3.5 to −3.1) | −1.4 (−1.9 to −0.9)* |
|  | 2012–2018 | 0.3 (−0.6 to 1.1) |
|  | 2018–2021 | 5.2* (1.6 to 8.9) |
|  | 2021–2023 | −3.7* (−6.9 to −0.4) |
| **Age Group** |  |  |  |
| 25–34 years | 1999–2023 | 1.0* (0.2 to 1.7) | 1.0 (0.2 to 1.7)* |
| 35–44 years | 1999–2014 | −0.9 (−1.8 to 0.1) | 1.4 (0.4 to 2.3)* |
|  | 2014–2023 | 5.3* (3.1 to 7.5) |
| 45–54 years | 1999–2012 | −2.0* (−2.8 to −1.3) | 0.7 (0.1 to 1.4)* |
|  | 2012–2023 | 4.1* (3.1 to 5.1) |
| 55–64 years | 1999–2010 | −4.2* (−4.5 to −4.0) | −0.8 (−1.6 to −0.1)* |
|  | 2010–2013 | −0.3 (−4.5 to 4.1) |
|  | 2013–2018 | 3.0* (1.7 to 4.3) |
|  | 2018–2021 | 7.4* (3.6 to 11.3) |
|  | 2021–2023 | −3.9* (−7.2 to −0.5) |
| 65–74 years | 1999–2009 | −5.1* (−5.5 to −4.8) | −2.0 (−2.7 to −1.3)* |
|  | 2009–2013 | −2.3 (−4.7 to 0.2) |
|  | 2013–2018 | 1.3 (−0.1 to 2.7) |
|  | 2018–2021 | 5.4* (1.3 to 9.6) |
|  | 2021–2023 | −4.3* (−7.8 to −0.6) |
| 75–84 years | 1999–2004 | −3.2* (−4.0 to −2.4) | −2.2 (−2.8 to −1.6)* |
|  | 2004–2011 | −4.6* (−5.2 to −3.9) |
|  | 2011–2018 | −1.1* (−1.9 to −0.4) |
|  | 2018–2021 | 4.9* (0.7 to 9.2) |
|  | 2021–2023 | −4.9* (−8.4 to −1.2) |
| ≥85 years | 1999–2014 | −3.9* (−4.2 to −3.6) | −2.1 (−2.4 to −1.8)* |
|  | 2014–2023 | 1.0* (0.3 to 1.6) |
| **Race/Ethnicity** |  |  |  |
| NH American Indian or Alaska Native | 1999–2023 | −1.1* (−1.6 to −0.7) | −1.1 (−1.6 to −0.7)* |
| NH Asian or Pacific Islander | 1999–2014 | −3.9* (−4.4 to −3.3) | −2.1 (−2.6 to −1.6)* |
|  | 2014–2023 | 0.9 (−0.1 to 1.9) |
| NH Black or African American | 1999–2012 | −3.7* (−4.1 to −3.4) | −1.7 (−2.5 to −0.9)* |
|  | 2012–2018 | 0.1 (−1.2 to 1.5) |
|  | 2018–2021 | 5.9* (0.4 to 11.9) |
|  | 2021–2023 | −4.7 (−9.6 to 0.4) |
| NH White | 1999–2012 | −4.0* (−4.2 to −3.8) | −1.9 (−2.5 to −1.2)* |
|  | 2012–2018 | −0.2 (−1.2 to 0.9) |
|  | 2018–2021 | 5.2* (0.6 to 9.9) |
|  | 2021–2023 | −3.3 (−7.5 to 1.1) |
| Hispanic or Latino | 1999–2012 | −4.4* (−4.8 to −4.1) | −2.6 (−3.4 to −1.8)* |
|  | 2012–2018 | −0.6 (−1.9 to 0.8) |
|  | 2018–2021 | 4.4 (−1.0 to 10.1) |
|  | 2021–2023 | −6.3* (−11.0 to −1.3) |
| **Census Region** |  |  |  |
| Northeast | 1999–2005 | −3.8* (−4.3 to −3.3) | −2.8 (−3.4 to −2.3)* |
|  | 2005–2009 | −5.6* (−7.3 to −3.9) |
|  | 2009–2017 | −2.3* (−2.8 to −1.8) |
|  | 2017–2020 | 2.4 (−1.4 to 6.3) |
|  | 2020–2023 | −3.6* (−5.4 to −1.7) |
| Midwest | 1999–2012 | −4.0* (−4.3 to −3.8) | −1.8 (−2.6 to −1.0)* |
|  | 2012–2018 | −0.0 (−1.3 to 1.3) |
|  | 2018–2021 | 5.7* (0.3 to 11.4) |
|  | 2021–2023 | −3.5 (−8.3 to 1.6) |
| South | 1999–2005 | −3.4* (−4.0 to −2.9) | −1.6 (−2.1 to −1.1)* |
|  | 2005–2011 | −4.8* (−5.5 to −4.0) |
|  | 2011–2018 | −0.1 (−0.7 to 0.5) |
|  | 2018–2021 | 5.9* (2.5 to 9.4) |
|  | 2021–2023 | −2.9 (−5.8 to 0.2) |
| West | 1999–2012 | −4.2* (−4.4 to −3.9) | −2.3 (−3.1 to −1.6)* |
|  | 2012–2018 | −0.9 (−2.1 to 0.4) |
|  | 2018–2021 | 4.5 (−0.8 to 10.0) |
|  | 2021–2023 | −4.7 (−9.5 to 0.4) |
| **Urbanizatiom Status** |  |  |  |
| Metropolitan | 1999–2012 | −4.2* (−4.4 to −4.0) | −2.4 (−2.8 to −1.9)* |
|  | 2012–2018 | −0.5 (−1.5 to 0.6) |
|  | 2018–2020 | 4.4 (−0.2 to 9.2) |
| Non-metropolitan | 1999–2013 | −3.5* (−3.8 to −3.3) | −1.9 (−2.2 to −1.6)* |
|  | 2013–2020 | 1.6* (0.7 to 2.4) |

**Supplementary Table 3.** Atherosclerotic Heart Disease (ASHD) and Heart Failure (HF)-related Age-Adjusted Mortality Rates (AAMR) per 100,000 Stratified by Race in the United States, (1999–2023)

| **Age-Adjusted Rate (95% CI)** | | | | | |
| --- | --- | --- | --- | --- | --- |
| **Year** | **NH White** | **NH Black or African American** | **NH American Indian or Alaska Native** | **Hispanic or Latino** | **NH Asian or Pacific Islander** |
| 1999 | 58.54 (58.16–58.93) | 46.10 (44.97–47.23) | 44.21 (38.77–49.66) | 43.01 (41.47–44.56) | 29.81 (27.89–31.72) |
| 2000 | 56.53 (56.15–56.91) | 45.07 (43.96–46.19) | 38.30 (33.47–43.13) | 40.78 (39.31–42.24) | 25.82 (24.09–27.55) |
| 2001 | 54.46 (54.09–54.83) | 42.35 (41.27–43.42) | 35.21 (30.62–39.81) | 40.00 (38.59–41.40) | 25.67 (24.04–27.30) |
| 2002 | 52.64 (52.28–53.00) | 42.13 (41.07–43.20) | 42.92 (37.89–47.95) | 38.28 (36.93–39.62) | 23.55 (22.04–25.05) |
| 2003 | 51.19 (50.84–51.55) | 40.93 (39.89–41.97) | 48.02 (42.71–53.33) | 37.16 (35.87–38.45) | 23.72 (22.25–25.19) |
| 2004 | 48.21 (47.87–48.55) | 38.66 (37.65–39.66) | 45.94 (40.83–51.04) | 34.15 (32.94–35.35) | 22.67 (21.28–24.06) |
| 2005 | 47.93 (47.59–48.27) | 38.97 (37.97–39.96) | 37.28 (32.84–41.71) | 34.44 (33.27–35.61) | 22.03 (20.71–23.34) |
| 2006 | 44.60 (44.28–44.92) | 36.48 (35.52–37.43) | 41.00 (36.36–45.64) | 33.01 (31.90–34.13) | 22.15 (20.88–23.43) |
| 2007 | 42.04 (41.73–42.35) | 34.56 (33.64–35.47) | 35.38 (31.11–39.65) | 30.45 (29.41–31.49) | 20.50 (19.31–21.70) |
| 2008 | 41.14 (40.84–41.45) | 33.41 (32.53–34.30) | 37.51 (33.20–41.82) | 29.00 (28.01–29.99) | 19.00 (17.90–20.11) |
| 2009 | 38.31 (38.02–38.61) | 31.06 (30.22–31.91) | 34.11 (30.13–38.09) | 26.30 (25.38–27.21) | 18.39 (17.33–19.45) |
| 2010 | 37.74 (37.45–38.03) | 30.66 (29.83–31.50) | 38.18 (34.02–42.34) | 26.54 (25.65–27.44) | 17.71 (16.69–18.73) |
| 2011 | 36.68 (36.40–36.96) | 28.97 (28.17–29.76) | 35.75 (31.84–39.67) | 25.07 (24.23–25.90) | 17.10 (16.14–18.05) |
| 2012 | 35.30 (35.02–35.57) | 28.69 (27.91–29.46) | 34.18 (30.47–37.88) | 24.13 (23.34–24.92) | 16.80 (15.89–17.71) |
| 2013 | 34.98 (34.71–35.25) | 28.54 (27.79–29.30) | 36.20 (32.51–39.89) | 24.45 (23.67–25.22) | 16.90 (16.02–17.78) |
| 2014 | 34.50 (34.23–34.76) | 28.14 (27.40–28.88) | 36.04 (32.48–39.60) | 23.82 (23.08–24.56) | 14.92 (14.13–15.72) |
| 2015 | 34.86 (34.60–35.13) | 29.37 (28.63–30.12) | 37.11 (33.61–40.61) | 23.98 (23.27–24.70) | 16.35 (15.55–17.14) |
| 2016 | 34.20 (33.94–34.46) | 28.52 (27.80–29.23) | 36.28 (32.91–39.65) | 23.58 (22.88–24.27) | 14.48 (13.75–15.21) |
| 2017 | 34.81 (34.54–35.07) | 29.01 (28.30–29.72) | 31.84 (28.77–34.90) | 23.26 (22.60–23.93) | 15.96 (15.22–16.70) |
| 2018 | 35.18 (34.92–35.44) | 28.56 (27.87–29.26) | 35.31 (32.20–38.42) | 23.71 (23.05–24.37) | 16.14 (15.42–16.87) |
| 2019 | 35.54 (35.28–35.80) | 29.24 (28.55–29.93) | 31.72 (28.83–34.60) | 23.57 (22.93–24.21) | 15.62 (14.93–16.32) |
| 2020 | 38.25 (37.98–38.52) | 33.97 (33.24–34.71) | 36.56 (33.39–39.72) | 26.19 (25.53–26.85) | 16.89 (16.18–17.61) |
| 2021 | 40.71 (40.42–40.99) | 33.59 (32.85–34.33) | 35.92 (32.81–39.03) | 26.72 (26.05–27.39) | 17.36 (16.64–18.09) |
| 2022 | 38.27 (38.00–38.54) | 32.12 (31.40–32.83) | 31.13 (28.37–33.90) | 24.06 (23.45–24.68) | 16.71 (16.03–17.39) |
| 2023 | 37.84 (37.58–38.11) | 31.21 (30.51–31.90) | 31.07 (28.36–33.78) | 23.71 (23.10–24.31) | 15.87 (15.22–16.52) |

**Supplementary Table 4.** Atherosclerotic Heart Disease (ASHD) and Heart Failure (HF)-related Age-Adjusted Mortality Rates (AAMR) per 100,000 Stratified by Census Region in the United States, (1999–2023)

| **Age-Adjusted Rate (95% CI)** | | | | |
| --- | --- | --- | --- | --- |
| **Year** | **Northeast** | **Midwest** | **South** | **West** |
| 1999 | 56.72 (55.96–57.47) | 60.40 (59.66–61.14) | 52.81 (52.23–53.39) | 58.12 (57.31–58.93) |
| 2000 | 55.08 (54.34–55.82) | 58.11 (57.39–58.83) | 51.42 (50.85–51.99) | 54.80 (54.02–55.58) |
| 2001 | 52.74 (52.02–53.47) | 54.82 (54.12–55.51) | 49.81 (49.26–50.37) | 53.42 (52.67–54.18) |
| 2002 | 50.32 (49.62–51.02) | 53.26 (52.58–53.94) | 48.09 (47.55–48.63) | 52.54 (51.80–53.29) |
| 2003 | 49.11 (48.42–49.79) | 51.21 (50.55–51.87) | 46.85 (46.32–47.38) | 51.23 (50.51–51.96) |
| 2004 | 46.21 (45.54–46.87) | 48.02 (47.39–48.66) | 44.18 (43.67–44.69) | 47.76 (47.07–48.45) |
| 2005 | 45.84 (45.18–46.49) | 48.71 (48.07–49.35) | 43.99 (43.49–44.50) | 46.28 (45.61–46.95) |
| 2006 | 42.13 (41.51–42.76) | 45.43 (44.82–46.04) | 40.84 (40.36–41.32) | 44.14 (43.49–44.79) |
| 2007 | 39.57 (38.97–40.17) | 42.71 (42.12–43.29) | 38.54 (38.08–39.00) | 41.12 (40.50–41.74) |
| 2008 | 38.39 (37.80–38.98) | 42.31 (41.73–42.89) | 36.81 (36.37–37.25) | 40.87 (40.27–41.48) |
| 2009 | 35.13 (34.57–35.69) | 39.17 (38.62–39.73) | 35.03 (34.60–35.46) | 37.44 (36.86–38.01) |
| 2010 | 35.28 (34.73–35.84) | 38.23 (37.68–38.78) | 34.44 (34.02–34.86) | 36.70 (36.14–37.27) |
| 2011 | 34.27 (33.73–34.82) | 37.72 (37.18–38.26) | 32.54 (32.14–32.94) | 35.63 (35.09–36.17) |
| 2012 | 33.09 (32.56–33.62) | 35.58 (35.06–36.10) | 32.26 (31.87–32.66) | 33.71 (33.19–34.23) |
| 2013 | 32.48 (31.95–33.00) | 35.19 (34.68–35.71) | 32.17 (31.78–32.55) | 33.39 (32.88–33.90) |
| 2014 | 31.98 (31.46–32.49) | 34.70 (34.20–35.21) | 31.64 (31.26–32.02) | 32.48 (31.98–32.98) |
| 2015 | 31.72 (31.20–32.23) | 35.32 (34.82–35.83) | 32.33 (31.95–32.71) | 32.91 (32.42–33.41) |
| 2016 | 29.88 (29.39–30.38) | 34.35 (33.85–34.84) | 31.61 (31.24–31.98) | 33.10 (32.62–33.59) |
| 2017 | 29.59 (29.11–30.08) | 36.08 (35.58–36.58) | 32.29 (31.92–32.66) | 32.72 (32.24–33.20) |
| 2018 | 30.43 (29.94–30.92) | 36.03 (35.53–36.53) | 32.75 (32.39–33.12) | 32.25 (31.79–32.72) |
| 2019 | 29.81 (29.33–30.29) | 35.99 (35.49–36.48) | 33.45 (33.08–33.81) | 32.81 (32.34–33.27) |
| 2020 | 32.17 (31.67–32.67) | 40.55 (40.03–41.07) | 35.44 (35.07–35.81) | 34.99 (34.51–35.46) |
| 2021 | 31.17 (30.68–31.67) | 41.82 (41.28–42.37) | 38.76 (38.36–39.16) | 37.16 (36.66–37.67) |
| 2022 | 29.23 (28.76–29.70) | 39.35 (38.83–39.86) | 36.62 (36.25–37.00) | 34.20 (33.74–34.67) |
| 2023 | 28.46 (27.99–28.93) | 39.26 (38.75–39.78) | 36.09 (35.72–36.46) | 33.55 (33.09–34.02) |

**Supplementary Table 5.** Age Stratified Atherosclerotic Heart Disease (ASHD) and Heart Failure (HF)-related Crude Mortality Rates (CMR) per 100,000 in in the United States, (1999–2023)

| **Crude Mortality Rate (95% CI)** | | | | | | | |
| --- | --- | --- | --- | --- | --- | --- | --- |
| **Year** | **25–34 years** | **35–44 years** | **45–54 years** | **55–64 years** | **65–74 years** | **75–84 years** | **≥85 years** |
| 1999 | 0.08 (0.05–0.11) | 0.54 (0.47–0.61) | 3.49 (3.30–3.68) | 18.67 (18.12–19.22) | 78.01 (76.73–79.28) | 276.12 (273.17–279.06) | 1087.38 (1077.35–1097.41) |
| 2000 | 0.08 (0.05–0.11) | 0.58 (0.51–0.65) | 3.40 (3.21–3.59) | 18.15 (17.61–18.68) | 74.68 (73.43–75.93) | 265.39 (262.52–268.26) | 1050.62 (1040.86–1060.38) |
| 2001 | 0.08 (0.05–0.11) | 0.50 (0.44–0.57) | 3.22 (3.05–3.40) | 17.14 (16.63–17.66) | 71.40 (70.18–72.63) | 258.69 (255.89–261.50) | 1003.55 (994.09–1013.00) |
| 2002 | 0.09 (0.06–0.13) | 0.65 (0.57–0.72) | 3.46 (3.28–3.65) | 16.35 (15.86–16.83) | 67.28 (66.10–68.47) | 249.72 (246.98–252.47) | 978.87 (969.59–988.15) |
| 2003 | 0.07 (0.05–0.10) | 0.52 (0.45–0.58) | 3.29 (3.11–3.47) | 16.35 (15.88–16.83) | 64.96 (63.80–66.12) | 242.60 (239.91–245.29) | 952.76 (943.71–961.81) |
| 2004 | 0.06 (0.04–0.09) | 0.55 (0.48–0.62) | 3.17 (3.00–3.34) | 15.24 (14.79–15.69) | 60.08 (58.97–61.19) | 232.98 (230.36–235.61) | 883.63 (874.99–892.28) |
| 2005 | 0.08 (0.05–0.11) | 0.56 (0.49–0.63) | 3.29 (3.12–3.46) | 14.59 (14.16–15.02) | 59.53 (58.43–60.63) | 227.71 (225.12–230.29) | 892.36 (883.81–900.90) |
| 2006 | 0.07 (0.05–0.10) | 0.55 (0.48–0.62) | 3.14 (2.97–3.30) | 14.01 (13.60–14.42) | 55.27 (54.22–56.32) | 211.91 (209.42–214.40) | 830.82 (822.72–838.92) |
| 2007 | 0.07 (0.05–0.10) | 0.53 (0.46–0.60) | 2.86 (2.70–3.02) | 13.21 (12.81–13.60) | 50.85 (49.86–51.85) | 198.62 (196.20–201.03) | 786.38 (778.64–794.12) |
| 2008 | 0.09 (0.06–0.12) | 0.51 (0.44–0.58) | 2.87 (2.71–3.03) | 12.97 (12.59–13.35) | 49.43 (48.47–50.39) | 193.59 (191.20–195.97) | 768.13 (760.60–775.67) |
| 2009 | 0.06 (0.04–0.09) | 0.48 (0.41–0.54) | 2.81 (2.65–2.96) | 12.02 (11.66–12.38) | 45.92 (45.01–46.83) | 181.83 (179.51–184.14) | 707.64 (700.52–714.75) |
| 2010 | 0.08 (0.05–0.11) | 0.42 (0.36–0.48) | 2.65 (2.50–2.80) | 11.69 (11.34–12.04) | 45.04 (44.14–45.93) | 179.10 (176.80–181.39) | 700.09 (693.09–707.09) |
| 2011 | 0.08 (0.06–0.12) | 0.56 (0.49–0.64) | 2.77 (2.61–2.92) | 11.68 (11.34–12.02) | 44.91 (44.03–45.78) | 171.85 (169.61–174.09) | 667.45 (660.77–674.14) |
| 2012 | 0.09 (0.06–0.12) | 0.50 (0.43–0.56) | 2.76 (2.60–2.91) | 11.73 (11.39–12.08) | 43.40 (42.57–44.24) | 165.64 (163.45–167.83) | 639.97 (633.51–646.43) |
| 2013 | 0.08 (0.06–0.12) | 0.52 (0.45–0.59) | 2.83 (2.67–2.99) | 11.62 (11.28–11.96) | 42.53 (41.73–43.34) | 165.37 (163.20–167.55) | 631.71 (625.37–638.04) |
| 2014 | 0.07 (0.05–0.10) | 0.50 (0.43–0.57) | 2.89 (2.73–3.05) | 11.82 (11.49–12.16) | 42.93 (42.14–43.72) | 159.97 (157.85–162.09) | 618.95 (612.74–625.16) |
| 2015 | 0.08 (0.06–0.11) | 0.52 (0.45–0.59) | 3.08 (2.92–3.25) | 12.36 (12.02–12.70) | 44.29 (43.51–45.08) | 162.61 (160.49–164.72) | 618.24 (612.10–624.39) |
| 2016 | 0.11 (0.08–0.14) | 0.57 (0.49–0.64) | 3.14 (2.98–3.31) | 12.80 (12.46–13.15) | 43.89 (43.12–44.65) | 157.56 (155.50–159.62) | 597.85 (591.85–603.85) |
| 2017 | 0.08 (0.05–0.11) | 0.55 (0.48–0.62) | 3.20 (3.03–3.37) | 13.15 (12.80–13.50) | 45.15 (44.39–45.92) | 157.72 (155.69–159.75) | 609.57 (603.55–615.58) |
| 2018 | 0.05 (0.03–0.08) | 0.60 (0.53–0.68) | 3.40 (3.22–3.58) | 13.52 (13.17–13.87) | 45.93 (45.17–46.69) | 157.99 (156.00–159.97) | 611.64 (605.65–617.64) |
| 2019 | 0.09 (0.06–0.12) | 0.62 (0.55–0.70) | 3.28 (3.11–3.46) | 14.03 (13.67–14.39) | 46.42 (45.67–47.17) | 159.51 (157.55–161.47) | 612.07 (606.10–618.04) |
| 2020 | 0.09 (0.06–0.12) | 0.68 (0.60–0.76) | 4.16 (3.96–4.36) | 15.87 (15.49–16.25) | 51.44 (50.66–52.22) | 173.33 (171.32–175.35) | 642.64 (636.56–648.73) |
| 2021 | 0.10 (0.07–0.13) | 0.77 (0.69–0.85) | 4.06 (3.86–4.25) | 16.68 (16.29–17.07) | 52.80 (52.03–53.58) | 179.10 (177.04–181.16) | 689.37 (682.71–696.03) |
| 2022 | 0.10 (0.07–0.13) | 0.75 (0.67–0.83) | 3.96 (3.77–4.16) | 15.82 (15.44–16.20) | 51.41 (50.64–52.17) | 170.25 (168.31–172.18) | 629.69 (623.59–635.80) |
| 2023 | 0.09 (0.07–0.13) | 0.73 (0.65–0.81) | 3.89 (3.70–4.09) | 15.50 (15.13–15.88) | 48.52 (47.79–49.26) | 162.48 (160.64–164.33) | 644.99 (638.67–651.31) |

**Supplementary Table 6.** Atherosclerotic Heart Disease (ASHD) and Heart Failure (HF)-related Age-Adjusted Mortality Rates (AAMR) per 100,000 Stratified by Urban-Rural Classification in the United States, (1999–2020)

| **Age-Adjusted Rate (95% CI)** | | |
| --- | --- | --- |
| **Year** | **Metropolitan** | **Non-metropolitan** |
| 1999 | 54.88 (54.50–55.27) | 63.65 (62.80–64.49) |
| 2000 | 52.78 (52.40–53.15) | 61.97 (61.14–62.80) |
| 2001 | 50.95 (50.58–51.31) | 58.76 (57.95–59.57) |
| 2002 | 49.26 (48.90–49.62) | 57.28 (56.48–58.07) |
| 2003 | 47.61 (47.26–47.96) | 56.88 (56.09–57.67) |
| 2004 | 44.56 (44.23–44.90) | 54.05 (53.29–54.82) |
| 2005 | 44.31 (43.98–44.64) | 53.88 (53.12–54.64) |
| 2006 | 41.41 (41.10–41.73) | 49.84 (49.11–50.57) |
| 2007 | 38.73 (38.43–39.03) | 47.59 (46.89–48.30) |
| 2008 | 37.67 (37.37–37.96) | 47.20 (46.50–47.90) |
| 2009 | 34.99 (34.71–35.27) | 44.17 (43.49–44.84) |
| 2010 | 34.43 (34.15–34.70) | 43.51 (42.85–44.18) |
| 2011 | 33.35 (33.08–33.62) | 41.67 (41.03–42.32) |
| 2012 | 32.20 (31.94–32.46) | 40.10 (39.47–40.73) |
| 2013 | 31.98 (31.72–32.23) | 39.39 (38.77–40.00) |
| 2014 | 31.25 (31.00–31.50) | 39.47 (38.86–40.08) |
| 2015 | 31.49 (31.25–31.74) | 40.87 (40.25–41.49) |
| 2016 | 30.78 (30.54–31.02) | 39.72 (39.12–40.33) |
| 2017 | 31.21 (30.97–31.45) | 40.55 (39.94–41.15) |
| 2018 | 31.39 (31.16–31.63) | 41.04 (40.43–41.65) |
| 2019 | 31.50 (31.26–31.73) | 41.94 (41.34–42.55) |
| 2020 | 34.03 (33.78–34.27) | 45.28 (44.65–45.91) |

**Supplementary Table 7.** Atherosclerotic Heart Disease (ASHD) and Heart Failure (HF)-related Age-Adjusted Mortality Rates (AAMR) per 100,000 Stratified by States in the United States, (1999–2023)

| **State** | **Age Adjusted Rate** | **Age Adjusted Rate Lower 95% CI** | **Age Adjusted Rate Upper 95% CI** |
| --- | --- | --- | --- |
| Alabama | 28.09 | 27.73 | 28.44 |
| Alaska | 27.76 | 26.44 | 29.08 |
| Arizona | 34.93 | 34.59 | 35.27 |
| Arkansas | 41.22 | 40.68 | 41.75 |
| California | 39.43 | 39.27 | 39.59 |
| Colorado | 38.55 | 38.1 | 38.99 |
| Connecticut | 30.66 | 30.27 | 31.06 |
| Delaware | 42.05 | 41.07 | 43.03 |
| District of Columbia | 28.6 | 27.54 | 29.66 |
| Florida | 32.05 | 31.89 | 32.22 |
| Georgia | 28.82 | 28.54 | 29.11 |
| Hawaii | 22.02 | 21.48 | 22.57 |
| Idaho | 40.52 | 39.74 | 41.3 |
| Illinois | 33.05 | 32.81 | 33.28 |
| Indiana | 44.18 | 43.8 | 44.56 |
| Iowa | 51.18 | 50.63 | 51.72 |
| Kansas | 40.99 | 40.45 | 41.52 |
| Kentucky | 43.2 | 42.73 | 43.68 |
| Louisiana | 34.14 | 33.72 | 34.56 |
| Maine | 40.87 | 40.12 | 41.61 |
| Maryland | 31.64 | 31.29 | 31.99 |
| Massachusetts | 29.87 | 29.58 | 30.17 |
| Michigan | 41.79 | 41.5 | 42.08 |
| Minnesota | 37.16 | 36.79 | 37.54 |
| Mississippi | 46.78 | 46.18 | 47.38 |
| Missouri | 37.48 | 37.12 | 37.84 |
| Montana | 32.98 | 32.18 | 33.78 |
| Nebraska | 44.66 | 43.97 | 45.36 |
| Nevada | 28.56 | 28.03 | 29.09 |
| New Hampshire | 40.42 | 39.62 | 41.21 |
| New Jersey | 33.8 | 33.51 | 34.08 |
| New Mexico | 32.39 | 31.8 | 32.98 |
| New York | 38.26 | 38.07 | 38.46 |
| North Carolina | 35.78 | 35.49 | 36.07 |
| North Dakota | 47.23 | 46.11 | 48.35 |
| Ohio | 52.66 | 52.35 | 52.96 |
| Oklahoma | 58.95 | 58.37 | 59.53 |
| Oregon | 46.64 | 46.14 | 47.13 |
| Pennsylvania | 40.67 | 40.44 | 40.91 |
| Rhode Island | 56.86 | 55.89 | 57.84 |
| South Carolina | 37.96 | 37.53 | 38.39 |
| South Dakota | 50.71 | 49.64 | 51.77 |
| Tennessee | 52.3 | 51.86 | 52.73 |
| Texas | 42.29 | 42.08 | 42.51 |
| Utah | 33.2 | 32.58 | 33.82 |
| Vermont | 51.56 | 50.29 | 52.83 |
| Virginia | 29.56 | 29.27 | 29.86 |
| Washington | 48.55 | 48.15 | 48.95 |
| West Virginia | 60 | 59.22 | 60.78 |
| Wisconsin | 37.09 | 36.73 | 37.44 |
| Wyoming | 37.29 | 36.05 | 38.54 |

**Supplementary Table 8:** Atherosclerotic Heart Disease (ASHD) and Heart Failure (HF)-related Age-Adjusted Mortality Rates (AAMR) per 100,000 Stratified, independently in the United States, (1999–2023)

| **Year** | **HF Age-Adjusted Rate (95% CI)** | **ASHD Age-Adjusted Rate (95% CI)** |
| --- | --- | --- |
| 1999 | 162.71 (162.12–163.31) | 285.30 (284.51–286.09) |
| 2000 | 162.58 (161.99–163.17) | 276.10 (275.33–276.87) |
| 2001 | 158.74 (158.16–159.32) | 266.95 (266.20–267.70) |
| 2002 | 155.91 (155.34–156.48) | 262.69 (261.95–263.43) |
| 2003 | 154.55 (153.99–155.11) | 253.18 (252.46–253.90) |
| 2004 | 149.80 (149.25–150.36) | 235.33 (234.64–236.02) |
| 2005 | 150.65 (150.10–151.20) | 231.09 (230.41–231.76) |
| 2006 | 142.56 (142.03–143.08) | 219.68 (219.03–220.33) |
| 2007 | 136.64 (136.13–137.15) | 209.71 (209.08–210.35) |
| 2008 | 135.80 (135.30–136.30) | 204.30 (203.68–204.91) |
| 2009 | 129.75 (129.27–130.24) | 192.76 (192.17–193.36) |
| 2010 | 129.57 (129.09–130.06) | 188.48 (187.90–189.07) |
| 2011 | 128.02 (127.55–128.50) | 182.61 (182.04–183.17) |
| 2012 | 125.62 (125.16–126.09) | 176.80 (176.25–177.35) |
| 2013 | 128.73 (128.26–129.19) | 172.22 (171.68–172.76) |
| 2014 | 129.55 (129.09–130.01) | 166.13 (165.60–166.65) |
| 2015 | 135.66 (135.19–136.12) | 164.07 (163.55–164.58) |
| 2016 | 135.39 (134.93–135.86) | 159.77 (159.27–160.28) |
| 2017 | 138.48 (138.02–138.94) | 159.18 (158.68–159.68) |
| 2018 | 140.96 (140.50–141.42) | 157.62 (157.13–158.11) |
| 2019 | 142.42 (141.96–142.88) | 156.14 (155.66–156.62) |
| 2020 | 154.40 (153.92–154.87) | 176.27 (175.76–176.78) |
| 2021 | 163.96 (163.47–164.47) | 179.04 (178.52–179.56) |
| 2022 | 155.91 (155.44–156.38) | 168.07 (167.58–168.56) |
| 2023 | 153.68 (153.21–154.15) | 158.83 (158.35–159.31) |

**Supplementary Table 9**: Age-Adjusted Mortality Rates (AAMR) for Atherosclerotic Heart Disease (ASHD) as the Underlying Cause of Death With Heart Failure (HF) as a Contributing Cause Among U.S. Adults, 1999–2023

| **Year** | **Age-Adjusted Rate (95% CI)** |
| --- | --- |
| 1999 | 40.90 (40.60–41.20) |
| 2000 | 38.93 (38.64–39.22) |
| 2001 | 37.44 (37.16–37.72) |
| 2002 | 36.08 (35.80–36.35) |
| 2003 | 34.89 (34.62–35.16) |
| 2004 | 32.45 (32.19–32.71) |
| 2005 | 32.16 (31.90–32.41) |
| 2006 | 29.72 (29.48–29.96) |
| 2007 | 27.54 (27.31–27.77) |
| 2008 | 26.66 (26.44–26.88) |
| 2009 | 24.62 (24.41–24.83) |
| 2010 | 24.06 (23.86–24.27) |
| 2011 | 22.93 (22.73–23.13) |
| 2012 | 22.09 (21.90–22.29) |
| 2013 | 21.83 (21.63–22.02) |
| 2014 | 21.46 (21.27–21.65) |
| 2015 | 21.52 (21.34–21.71) |
| 2016 | 20.95 (20.77–21.13) |
| 2017 | 20.88 (20.70–21.06) |
| 2018 | 20.92 (20.75–21.10) |
| 2019 | 20.82 (20.64–20.99) |
| 2020 | 20.90 (20.73–21.08) |
| 2021 | 21.91 (21.73–22.09) |
| 2022 | 20.47 (20.30–20.65) |
| 2023 | 20.41 (20.23–20.58) |
